# Effects of Mechanical Ventilation on Release of Cytokines into Systemic Circulation in Patients with Normal Pulmonary Function

Hermann Wrigge, M.D.,\* Jörg Zinserling, M.Sc.,† Frank Stüber, M.D.,‡ Tilman von Spiegel, M.D.,§ Rudolf Hering, M.D.,|| Silke Wetegrove, M.D.,# Andreas Hoeft, M.D.,\*\* Christian Putensen, M.D.††

**Background:** Mechanical ventilation with high tidal volumes ( $V_T$ ) in contrast to mechanical ventilation with low  $V_T$  has been shown to increase plasma levels of proinflammatory and anti-inflammatory mediators in patients with acute lung injury. The authors hypothesized that, in patients without previous lung injury, a conventional potentially injurious ventilatory strategy with high  $V_T$  and zero end-expiratory pressure (ZEEP) will not cause a cytokine release into systemic circulation.

**Methods:** A total of 39 patients with American Society of Anesthesiologists physical status I-II and without signs of systemic infection scheduled for elective surgery with general anesthesia were randomized to receive mechanical ventilation with either (1)  $V_T$  = 15 ml/kg ideal body weight on ZEEP, (2)  $V_T$  = 6 ml/kg ideal body weight on ZEEP, or (3)  $V_T$  = 6 ml/kg ideal body weight on positive end-expiratory pressure of 10 cm  $H_2O$ . Plasma levels of proinflammatory and anti-inflammatory mediators tumor necrosis factor, interleukin (IL)-6, IL-10, and IL-1 receptor antagonist were determined before and 1 h after the initiation of mechanical ventilation.

**Results:** Plasma levels of all cytokines remained low in all settings. IL-6, tumor necrosis factor, and IL-1 receptor antagonist did not change significantly after 1 h of mechanical ventilation. IL-10 was below the detection limit (10 pg/ml) in 35 of 39 patients. There were no differences between groups.

**Conclusions:** Initiation of mechanical ventilation for 1 h in patients without previous lung injury caused no consistent changes in plasma levels of studied mediators. Mechanical ventilation with high  $V_T$  on ZEEP did not result in higher cytokine levels compared with lung-protective ventilatory strategies. Previous lung damage seems to be mandatory to cause an increase in plasma cytokines after 1 h of high  $V_T$  mechanical ventilation. (Key words: Inflammation; lung; mediators; ventilator-associated lung injury.)

POSITIVE pressure ventilation is commonly applied in patients undergoing general anesthesia to assure adequate ventilation and gas exchange. Conventional mechanical ventilation still uses low positive end-expiratory pressure (PEEP) levels with high tidal volumes ( $V_T$ ) ranging between 10 and 15 ml/kg ideal body weight.<sup>1-4</sup> However, positive pressure ventilation alone or in combination with preexisting lung disease may contribute

considerably to lung injury, including pneumothorax, alveolar edema, and alveolar rupture.<sup>5,6</sup>

Mechanical ventilation with PEEP titrated above the lower inflection pressure of a static pressure-volume curve and low  $V_T$  has been suggested to prevent tidal collapse and overdistension of lung regions during severe acute respiratory distress syndrome (ARDS).<sup>7</sup> This lung-protective ventilatory strategy has been shown to improve gas exchange and outcome in patients with ARDS.<sup>8</sup> Recently, Ranieri *et al.*<sup>9</sup> observed higher systemic and intraalveolar levels of proinflammatory cytokines in ARDS patients during mechanical ventilation with low PEEP and high  $V_T$  when compared with lung-protective strategy. Therefore, it has been speculated that conventional mechanical ventilation may induce release of inflammatory mediators and thereby contribute to lung injury.<sup>10</sup> *In vitro* experiments have demonstrated that mechanical stress to lung cells is associated with release of inflammatory mediators.<sup>11,12</sup> However, acute lung injury or ARDS itself causes an inflammation of the lungs with increased systemic and intraalveolar concentrations of the proinflammatory cytokines.<sup>13</sup> It is unclear whether mechanical ventilation alone or only in the presence of acute lung injury can release inflammatory cytokines into systemic circulation.

We hypothesized that, in patients with normal lungs, mechanical ventilation with high  $V_T$  does not induce release of cytokines into the systemic circulation. To test this hypothesis, we measured proinflammatory and anti-inflammatory cytokines in the plasma of anesthetized patients with healthy lungs while they were mechanically ventilated with lung-protective or conventional strategies.

## Materials and Methods

Approval of the Bonn University Ethics Committee, Bonn, Germany, for the study protocol was obtained, and all patients gave written informed consent before inclusion in the study.

Thirty-nine adult patients classified as American Society of Anesthesiologists physical status I or II scheduled for elective extrathoracic surgery with general anesthesia (table 1) were eligible to participate in the study.<sup>14</sup> Patients with history or clinical signs of lung disease, history of smoking, age older than 65 yr, immunosuppression by drugs or underlying condition, elevated leu-

\* # Resident, † Research Associate, ‡ Associate Professor, § || Staff Anesthesiologist, \*\* †† Professor.

Received from the Department of Anesthesiology and Intensive Care Medicine, University of Bonn, Bonn, Germany. Submitted for publication April 13, 2000. Accepted for publication July 18, 2000. Supported by a grant from the BONFOR Forschungsförderung (Projekt O-117.0006), University of Bonn, Bonn, Germany. Presented in part at the annual meeting of the American Thoracic Society, Toronto, Canada, May 5-10, 2000.

Address reprint requests to Dr. Wrigge: Department of Anesthesiology and Intensive Care Medicine, University of Bonn, Sigmund-Freud-Strasse 25, D-53105 Bonn, Germany. Address electronic mail to: hwrigge@uni-bonn.de. Individual article reprints may be purchased through the Journal Web site, www.anesthesiology.org.

**Table 1. Demographic and Clinical Data**

| Parameter              | High V <sub>T</sub> ZEEP | Low V <sub>T</sub> ZEEP | Low V <sub>T</sub> PEEP |
|------------------------|--------------------------|-------------------------|-------------------------|
| Number of patients     | 13                       | 13                      | 13                      |
| Age (yr)               | 46 ± 19                  | 49 ± 14                 | 49 ± 14                 |
| Gender (M/F)           | 7/6                      | 8/5                     | 7/6                     |
| Ideal body weight (kg) | 65 ± 15                  | 61 ± 8                  | 63 ± 10                 |
| ASA I/II (n)           | 5/8                      | 3/10                    | 3/10                    |
| Scheduled surgery      |                          |                         |                         |
| Abdominal              | 5                        | 6                       | 6                       |
| Bone                   | 1                        | 1                       | 1                       |
| Vascular               | 4                        | 2                       | 1                       |
| Other                  | 3                        | 4                       | 5                       |

V<sub>T</sub> = tidal volume; ZEEP = zero end-expiratory pressure; PEEP = positive end-expiratory pressure; ASA = American Society of Anesthesiologists.

kocyte count, or clinical signs of a systemic infection were not included in the study.

All patients received a standard premedication of 7.5 mg midazolam orally on the day of surgery. Anesthesia was induced using thiopental (4–6 mg/kg administered intravenously) and fentanyl (1–2 µg/kg administered intravenously). Thereafter, cis-atracurium (0.10–0.15 mg/kg administered intravenously) was given to facilitate tracheal intubation. Mechanical ventilation was provided with an anesthesia ventilator connected to a circle system (Julian, Dräger, Lübeck, Germany) with a fresh gas flow of air-oxygen at 4 l/min and an inspiratory fraction of oxygen of 0.30. Anesthesia was maintained with 0.5 minimum alveolar concentration of isoflurane and supplemental doses of fentanyl as required. Routine perioperative monitoring included measurement of noninvasive blood pressure, pulse oximetry, and electrocardiogram (CS/3, Datex-Ohmeda, Helsinki, Finland). End-tidal fractions of carbon dioxide and isoflurane were measured using infrared absorption capnography (Julian, Dräger). All patients received infusion of 1.5 l of crystalloid fluids during the study period to assure hemodynamic stability.

#### Ventilatory Measurements

Gas flow was measured at the proximal end of the tracheal tube with a heated pneumotachograph (No. 2; Fleisch, Lausanne, Switzerland) connected to a differential pressure transducer (Huba Control, Würenlos, Switzerland). Airway pressure was measured at the proximal end of the tracheal tube with another differential gas-pressure transducer (SMT, Munich, Germany). All signals were sampled with an analog-digital converter board (PCM-DAS16S/12, Mansfield, MA) installed in a personal computer. Digitized signals were plotted in real time on the computer screen and stored on magnetic media for offline analysis. V<sub>T</sub> and minute ventilation were derived from the integrated gas flow signal.

#### Cytokine Measurements

Venous EDTA blood samples of 5 ml were centrifuged at 1,500g for 5 min, and the plasma was aspirated and stored at –70°C. Commercially available enzyme-linked

immunosorbent assays were used to measure plasma levels of interleukin (IL)-6, tumor necrosis factor (TNF) (Biosource, Ratingen, Germany), IL-10, and IL-1 receptor antagonist (R&D Systems, Minneapolis, MN). All enzyme-linked immunosorbent assay analyses were performed with strict adherence to the manufacturers' guidelines.

#### Protocol

All patients remained supine throughout the study period. Baseline measurements were obtained immediately before induction of anesthesia.

After induction of anesthesia, patients were randomly assigned to receive either mechanical ventilation with V<sub>T</sub> of 15 ml/kg ideal body weight and zero end-expiratory pressure (ZEEP) (high V<sub>T</sub>, ZEEP group), a V<sub>T</sub> of 6 ml/kg ideal body weight and ZEEP (low V<sub>T</sub>, ZEEP group), or V<sub>T</sub> of 6 ml/kg ideal body weight and 10 cm H<sub>2</sub>O PEEP (low V<sub>T</sub>, PEEP group). The ventilator rate was adjusted to maintain end-tidal carbon dioxide partial pressure between 35 and 45 mmHg. After ventilation with the assigned mode was stable for 1 h, the measurements were repeated. Thereafter, data collection was concluded and the surgical procedure was allowed to commence.

#### Statistics

To detect differences in cytokine plasma levels between the ventilatory settings with the given two-sided parallel design at a significance level of 5% ( $\alpha = 0.05$ ) with a probability of 80% ( $\beta = 0.20$ ) based on an estimated difference of 0.85 of the parameter's mean SD, a minimum of 39 patients were to be studied.

Results are expressed as mean ± SD. All statistical analysis were performed using a statistical software package (Statistica for Windows 5.1, StatSoft, Inc., Tulsa, OK). Data were tested for normal distribution with the Shapiro-Wilks W test. Ventilatory variables were analyzed using a one-way analysis of variance. When a sig-

**Table 2. Ventilatory Variables\***

| Parameter                                 | High V <sub>T</sub> ZEEP | Low V <sub>T</sub> ZEEP | Low V <sub>T</sub> PEEP |
|-------------------------------------------|--------------------------|-------------------------|-------------------------|
| Ventilatory rate (l/min)                  | 6.3 ± 0.7                | 22.9 ± 4.0†             | 22.3 ± 5.3†             |
| V <sub>T</sub> (ml)                       | 1,024 ± 210              | 411 ± 53†               | 430 ± 71†               |
| V <sub>E</sub> (l/min)                    | 6.5 ± 1.3                | 9.3 ± 1.6†              | 9.4 ± 1.9†              |
| T <sub>I</sub> (s)                        | 4.6 ± 0.7                | 1.3 ± 0.3†              | 1.3 ± 0.4†              |
| T <sub>E</sub> (s)                        | 5.0 ± 0.5                | 1.4 ± 0.2†              | 1.5 ± 0.5†              |
| T <sub>I</sub> /T <sub>E</sub>            | 0.48                     | 0.47                    | 0.46                    |
| Paw <sub>mean</sub> (cm H <sub>2</sub> O) | 6.6 ± 3.5                | 5.3 ± 1.4               | 12.7 ± 0.5†§            |
| Paw <sub>max</sub> (cm H <sub>2</sub> O)  | 16.1 ± 4.9               | 12.1 ± 3.3‡             | 17.9 ± 1.5              |
| PETCO <sub>2</sub> (mmHg)                 | 36 ± 3                   | 41 ± 3‡                 | 41 ± 5‡                 |

\* Values are mean ± SD.

†  $P < 0.001$  and ‡  $P < 0.05$  compared with high tidal volume (V<sub>T</sub>) at zero end-expiratory pressure (ZEEP) mechanical ventilation group. §  $P < 0.001$  and ||  $P < 0.005$  between low V<sub>T</sub> mechanical ventilation groups.

PEEP = positive end-expiratory pressure; V<sub>E</sub> = minute ventilation; T<sub>I</sub> = inspiratory time; T<sub>E</sub> = expiratory time; Paw<sub>mean</sub> = mean airway pressure; Paw<sub>max</sub> = maximum airway pressure; PETCO<sub>2</sub> = end-tidal partial pressure of carbon dioxide.

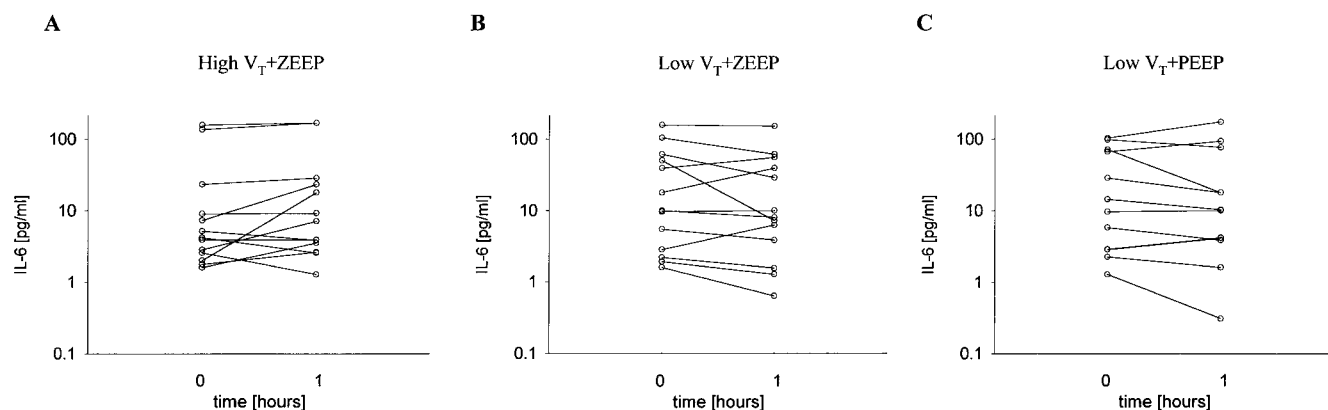

**Fig. 1.** Changes in interleukin (IL)-6 plasma levels before and 1 h after initiation of mechanical ventilation. (A) High-tidal-volume ( $V_T$ ) mechanical ventilation; (B and C) low- $V_T$  mechanical ventilation settings. ZEEP = zero end-expiratory pressure; PEEP = positive end-expiratory pressure.

nificant F ratio was obtained, differences between the means were isolated with the *post hoc* Tukey multiple comparison test. Because cytokine data were not normally distributed, a two-way analysis of variance was performed after  $\log_{10}$  transformation to permit the application of a parametric test. Differences were considered to be statistically significant at  $P$  values less than 0.05.

## Results

There were no statistically significant differences in the demographic or clinical data between patients of the studied groups (table 1).

Ventilatory variables are shown in table 2. During mechanical ventilation with low  $V_T$ , a higher ventilator rate ( $P < 0.001$ ) and a higher minute ventilation ( $P < 0.001$ ) were required to achieve the desired end-tidal carbon dioxide partial pressure range, compared with high  $V_T$  mechanical ventilation. Increase in ventilatory rate was associated with a reduction of inspiratory time and expiratory time ( $P < 0.05$ ), whereas the inspiratory time/expiratory time ratio remained unchanged. Peak airway pressure was lowest during mechanical ventilation with

low  $V_T$  at ZEEP. In the presence of PEEP, mechanical ventilation with low  $V_T$  resulted in the highest mean airway pressure. End-tidal carbon dioxide partial pressure was lowest during mechanical ventilation with high  $V_T$  at ZEEP.

Cytokine plasma levels are shown in figures 1–3. The response of the cytokine levels to starting mechanical ventilation was neither significantly different between the three ventilatory strategies nor statistically different after 1 h of ventilation in each individual group. Plasma levels of IL-10 remained below the detection limit (10 pg/ml) in 35 of 39 patients both at baseline and after 1 h of mechanical ventilation.

## Discussion

This study was designed to evaluate the effects of different ventilatory strategies on the release of inflammatory mediators into the systemic circulation of anesthetized patients who had healthy lungs. We were unable to detect statistically significant differences in cytokine release between potentially injurious and protective ventilatory strategies after 1 h of ventilation.

Mechanical ventilation is usually provided by using

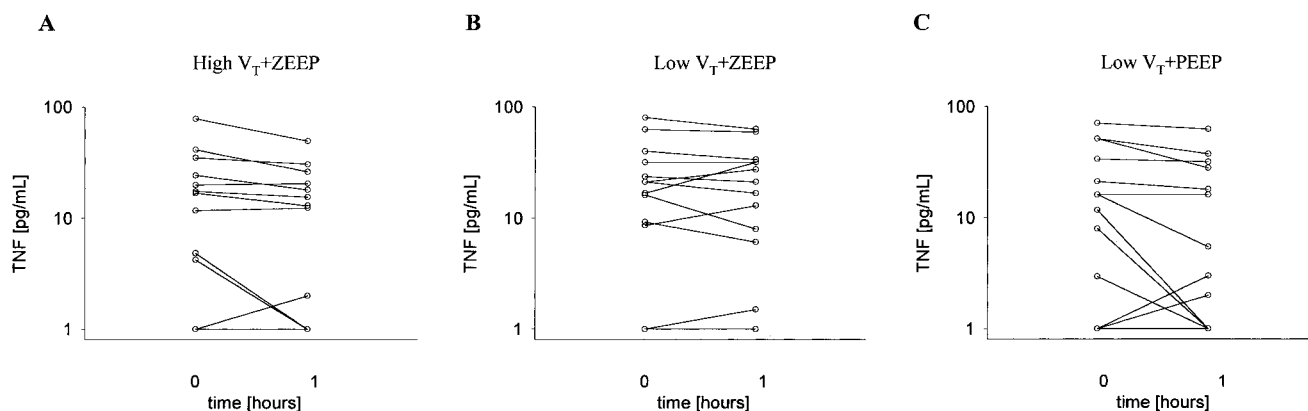

**Fig. 2.** Tumor necrosis factor (TNF) plasma concentrations before and 1 h after initiation of mechanical ventilation for the three different ventilatory treatment groups.  $V_T$  = tidal volume; ZEEP = zero end-expiratory pressure; PEEP = positive end-expiratory pressure.

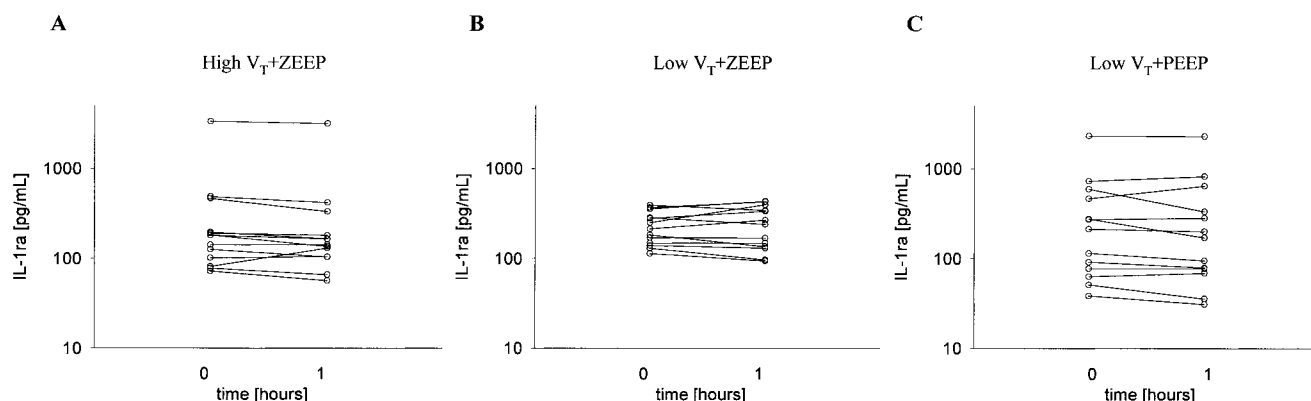

**Fig. 3.** Plasma levels of interleukin (IL)-1 receptor antagonist before and after 1 h of mechanical ventilation with high-tidal-volume ( $V_T$ ) or two different low-tidal-volume mechanical ventilation settings. ZEEP = zero end-expiratory pressure; PEEP = positive end-expiratory pressure.

low PEEP levels with high  $V_T$  ranging between 10 and 15 ml/kg ideal body weight.<sup>1-4</sup> Based on experimental data, mechanical ventilation with high  $V_T$  has been claimed to overdistend functional lung units and contribute to direct lung damage.<sup>6</sup> Mechanical stress such as shear stress has been found to induce production of inflammatory cytokines in isolated endothelial,<sup>15</sup> epithelial,<sup>16</sup> and macrophage cells.<sup>17</sup> Experimental and clinical studies have investigated the production of inflammatory mediators in injured lungs induced by various ventilatory strategies.<sup>9,11,12,17-20</sup> Based on these findings, inflammatory cytokines have been implicated as contributors to ventilator-associated lung injury.<sup>21</sup> A recent multicenter trial of 861 patients demonstrated a reduction in mortality by 22% and lower systemic cytokine levels when  $V_T$  was reduced from 12 to 6 ml/kg ideal body weight.<sup>22</sup>

We studied the effect of different ventilatory strategies on systemic cytokine levels during anesthesia before elective surgery. Although our patients had an essentially normal pulmonary function, previous computed tomography studies have clearly demonstrated alveolar collapse and atelectasis soon after induction of anesthesia and mechanical ventilation in previously healthy patients,<sup>23,24</sup> which can be prevented with a PEEP of 10 cm  $H_2O$ .<sup>25</sup> Thus, the lung-protective ventilatory settings in this study should have prevented tidal alveolar collapse and overdistension, whereas the potentially injurious ventilatory should have not.<sup>23</sup> The latter has been suggested to result in shear forces with transmural pressures of up to 100 cm  $H_2O$  applied to lung cells.<sup>26</sup>

In our patients, we did not observe consistent differences in proinflammatory and antiinflammatory cytokine plasma levels depending on different ventilatory strategies, and all levels were still within the variability observed in healthy volunteers.<sup>27</sup> Therefore, our findings appear to be in contrast with previous experimental<sup>12</sup> and clinical<sup>9,28</sup> observations, indicating a marked systemic inflammatory response in the presence of an injurious ventilatory strategy using low PEEP and high  $V_T$ . Variation in the systemic cytokine concentrations ob-

served during injurious mechanical ventilation may be attributed to the difference in the design and the experimental conditions of the individual studies. Tremblay *et al.*<sup>12</sup> found pronounced production of cytokines induced by injurious mechanical ventilation in animals pretreated with intravenous lipopolysaccharides,<sup>1</sup> whereas pressure stretching of cultivated alveolar macrophages in absence of lipopolysaccharides as an inflammatory costimulus could not induce TNF and IL-6 excretion.<sup>17</sup> These findings support our observation that mechanical ventilation seems to induce no inflammation in normal lungs, but may well augment lung inflammation to clinically important levels in preinjured or infected lungs. In agreement with our findings, in rats without lung injury, mechanical ventilation with  $V_T$  set at 10 ml/kg did not affect bronchoalveolar lavage fluid content of IL-1 $\alpha$ , IL-1 $\beta$ , IL-6, macrophage inflammatory protein-2, and TNF when compared with spontaneous breathing,<sup>19</sup> whereas in a rat model with hydrochloric acid instillation-induced lung injury, mechanical ventilation with  $V_T$  of 16 ml and ZEEP resulted in a marked increase in TNF and macrophage inflammatory protein-2 when compared with  $V_T$  of 9 ml and PEEP of 5 cm  $H_2O$ .<sup>1</sup>

Unfortunately, we cannot draw conclusions on lung tissue cytokine concentrations on the basis of plasma cytokine levels. Previous studies suggest that an increase in alveolar-capillary permeability is required for translocation of mediators, including cytokines, from the lung into the circulation.<sup>29,30</sup> Because inflammatory mediators cause an increase in vascular and alveolar permeability, a relevant accumulation of cytokines in the lungs should have resulted in an increased release of cytokines into the blood and alveolar fluid.

It is also important to note that we tested each ventilatory strategy only for 1 h. Experimental data have demonstrated that intraalveolar expression of TNF gene<sup>31</sup> and increased TNF levels in the systemic circulation<sup>11</sup> can be found after 1 h of injurious mechanical ventilation in lung injury models. Preliminary clinical data in patients with injured lungs indicate that maximal



increase in alveolar and systemic cytokine concentrations occurs within 1 h after initiating mechanical ventilation with low PEEP and high  $V_T$ .<sup>28</sup> Therefore, the lack of an increase in plasma cytokines during injurious mechanical ventilation in our patients should not be attributed to a time-related component on the cytokine release. However, we did not study long-term effects of mechanical ventilation on cytokine production in healthy lungs or the effects of mechanical ventilation combined with a surgical intervention, which itself may cause an inflammatory response or even bacteremia.

General anesthesia itself has been suggested to modulate the inflammatory response during mechanical ventilation.<sup>32</sup> Recent experimental data suggest that inflammatory response to mechanical ventilation may be aggravated by inhalation of volatile anesthetics after 2 h.<sup>19</sup> Studies comparing the immune response to standardized elective surgery in patients during propofol *versus* isoflurane anesthesia have revealed no differences<sup>33</sup> or a minimally diminished systemic inflammatory response with propofol and alfentanil when compared with isoflurane and nitrous oxide anesthesia.<sup>34</sup> Anesthesia in all of our patients was provided with isoflurane and fentanyl. Therefore, it is unlikely that anesthesia has a major influence on our results after a study period of only 1 h.

Our data suggest that in essentially normal lungs of anesthetized patients, short-term mechanical ventilation with high  $V_T$  in the presence or absence of PEEP induces no clinical relevant increase in systemic proinflammatory and antiinflammatory cytokines. This observation is indirect evidence that mechanical ventilation seems to induce no inflammation in normal lungs, but may well augment lung inflammation to clinically important levels in preinjured or infected lungs as previously shown.

The authors are grateful to Alexandra Casalter, Department of Anesthesiology and Intensive Care Medicine, University of Bonn, Bonn, Germany, for technical laboratory assistance, and Jukka Räsänen, M.D., Department of Anesthesiology, Mayo Clinic, Rochester, Minnesota, for careful critique of the manuscript.

## References

- Marini JJ: New options for the ventilatory management of acute lung injury. *New Horiz* 1993; 1:489–503
- Roupie E, Dambrosio M, Servillo G, Mentec H, el Atrous S, Beydon L, Brun Buisson C, Lemaire F: Titration of tidal volume and induced hypercapnia in acute respiratory distress syndrome. *Am J Respir Crit Care Med* 1995; 152:121–8
- Brochard L, Roudot-Thoraval F, Roupie E, Delclaux C, Chastre J, Fernandez-Mondejar E, Clementi E, Mancebo J, Factor P, Matamis D, Ranieri M, Blanch L, Rodi G, Mentec H, Dreyfuss D, Ferrer M, Brun-Buisson C, Tobin M, Lemaire F: Tidal volume reduction for prevention of ventilator-induced lung injury in acute respiratory distress syndrome. The Multicenter Trial Group on Tidal Volume reduction in ARDS. *Am J Respir Crit Care Med* 1998; 158:1831–8
- Stewart TE, Meade MO, Cook DJ, Granton JT, Hodder RV, Lapinsky SE, Mazer CD, McLean RF, Rogovein TS, Schouten BD, Todd TR, Slutsky AS: Evaluation of a ventilation strategy to prevent barotrauma in patients at high risk for acute respiratory distress syndrome: Pressure- and Volume-Limited Ventilation Strategy Group. *N Engl J Med* 1998; 338:355–61
- Parker JC, Hernandez LA, Peevy KJ: Mechanisms of ventilator-induced lung injury. *Crit Care Med* 1993; 21:131–43
- Dreyfuss D, Saumon G: Ventilator-induced lung injury: Lessons from experimental studies. *Am J Respir Crit Care Med* 1998; 157:294–323
- Amato MB, Barbas CS, Medeiros DM, Schettino G-P, Lorenzi Filho G, Kairalla RA, Deheinzelin D, Morais C, Fernandes E-O, Takagaki TY: Beneficial effects of

- the 'open lung approach' with low distending pressures in acute respiratory distress syndrome: A prospective randomized study on mechanical ventilation. *Am J Respir Crit Care Med* 1995; 152:1835–46
- Amato MB, Barbas CS, Medeiros DM, Magaldi RB, Schettino GP, Lorenzi FG, Kairalla RA, Deheinzelin D, Munoz C, Oliveira R, Takagaki TY, Carvalho CR: Effect of a protective-ventilation strategy on mortality in the acute respiratory distress syndrome. *N Engl J Med* 1998; 338:347–54
- Ranieri VM, Suter PM, Tortorella C, De Tullio R, Dayer JM, Brienza A, Bruno F, Slutsky AS: Effect of mechanical ventilation on inflammatory mediators in patients with acute respiratory distress syndrome: A randomized controlled trial. *JAMA* 1999; 282:54–61
- Tremblay LN, Slutsky AS: Ventilator-induced injury: From barotrauma to biotrauma. *Proc Assoc Am Physicians* 1998; 110:482–8
- Chiumello D, Pristine G, Slutsky AS: Mechanical ventilation affects local and systemic cytokines in an animal model of acute respiratory distress syndrome. *Am J Respir Crit Care Med* 1999; 160:109–16
- Tremblay L, Valenza F, Ribeiro SP, Li J, Slutsky AS: Injurious ventilatory strategies increase cytokines and c-fos m-RNA expression in an isolated rat lung model. *J Clin Invest* 1997; 99:944–52
- Suter PM, Ricou B: Cytokines and lung injury. *Acute Lung Injury*. Edited by Marini JJ, Evans TW. Berlin, Springer-Verlag, 1998, pp 41–53
- Saklad M: Grading of patients for surgical procedures. *ANESTHESIOLOGY* 1941; 2:281
- Iba T, Maitz S, Furbert T, Rosales O, Widmann MD, Spillane B, Shin T, Sonoda T, Sumpio BE: Effect of cyclic stretch on endothelial cells from different vascular beds. *Circ Shock* 1991; 35:193–8
- Vlahakis NE, Schroeder MA, Limper AH, Hubmayr RD: Stretch induced cytokine release by alveolar epithelial cells in vitro. *Am J Physiol* 1999; 277:L167–73
- Pugin J, Dunn I, Jolliet P, Tassaux D, Magnenat JL, Nicod LP, Chevrolet JC: Activation of human macrophages by mechanical ventilation in vitro. *Am J Physiol* 1998; 275:L1040–50
- von-Bethmann AN, Brasch F, Nusing R, Vogt K, Volk HD, Muller KM, Wendel A, Uhlig S: Hyperventilation induces release of cytokines from perfused mouse lung. *Am J Respir Crit Care Med* 1998; 157:263–72
- Kotani N, Takahashi S, Sessler DI, Hashiba E, Kubota T, Hashimoto H, Matsuki A: Volatile anesthetics augment expression of proinflammatory cytokines in rat alveolar macrophages during mechanical ventilation. *ANESTHESIOLOGY* 1999; 91:187–97
- Muscledere JG, Mullen JB, Gan K: Tidal ventilation at low airway pressure can augment lung injury. *Am J Respir Crit Care Med* 1994; 149:1327–34
- International Consensus Conferences in Intensive Care Medicine: Ventilator-associated Lung Injury in ARDS. *Am J Respir Crit Care Med* 1999; 160:2118–24
- The Acute Respiratory Distress Syndrome Network: Ventilation with lower tidal volumes as compared with traditional tidal volumes for acute lung injury and the acute respiratory distress syndrome. *N Engl J Med* 2000; 342:1301–8
- Rothen HU, Neumann P, Berglund JE, Valtysson J, Magnusson A, Hedenstierna G: Dynamics of re-expansion of atelectasis during general anaesthesia. *Br J Anaesth* 1999; 82:551–6
- Rothen HU, Sporre B, Engberg G, Wegenius G, Hedenstierna G: Re-expansion of atelectasis during general anaesthesia: A computed tomographic study. *Br J Anaesth* 1993; 71:788–95
- Neumann P, Rothen HU, Berglund JE, Valtysson J, Magnusson A, Hedenstierna G: Positive end-expiratory pressure prevents atelectasis during general anaesthesia even in the presence of a high inspired oxygen concentration. *Acta Anaesthesiol Scand* 1999; 43:295–301
- Mead J, Takishima T: Stress distribution in lungs: A model of pulmonary elasticity. *J Appl Physiol* 1970; 28:596–608
- Dugue B, Leppanen E: Short-term variability in the concentration of serum interleukin-6 and its soluble receptor in subjectively healthy persons. *Clin Chem Lab Med* 1998; 36:323–5
- Stüber F, Wetegrove S, Schröder S, Wrigge H, Zinserling J, Hoeft A, Putensen C: Release of cytokines by low-PEEP high tidal volume ventilation in patients with ALI [abstract]. *Am J Respir Crit Care Med* 1999; 159:A457
- Tutor JD, Mason CM, Dobard E, Beckerman RC, Summer WR, Nelson S: Loss of compartmentalization of alveolar tumor necrosis factor after lung injury. *Am J Respir Crit Care Med* 1994; 149:1107–11
- Gullo A, Berlot G, Viviani M: The role of adult respiratory distress syndrome in the multiple organ dysfunction syndrome. *Acta Anaesthesiol Scand Suppl* 1996; 109:70–3
- Takata M, Abe J, Tanaka H, Kitano Y, Doi S, Kohsaka T, Miyasaka K: Intraalveolar expression of tumor necrosis factor- $\alpha$  gene during conventional and high-frequency ventilation. *Am J Respir Crit Care Med* 1997; 156:272–9
- Galley HF, DiMatteo MA, Webster NR: Immunomodulation by anesthetic, sedative and analgesic agents: Does it matter? *Intensive Care Med* 2000; 26:267–74
- Pirttikangas CO, Salo M, Mansikka M, Gronroos J, Pulkki K, Peltola O: The influence of anesthetic technique upon the immune response to hysterectomy: A comparison of propofol infusion and isoflurane. *Anaesthesia* 1995; 50:1056–61
- Crozier TA, Muller JE, Quittkat D, Sydow M, Wuttke W, Kettler D: Effect of anaesthesia on the cytokine responses to abdominal surgery. *Br J Anaesth* 1994; 72:280–5
